# Supplementary material for: Sex, Gender, and Equity in Cardiovascular Medicine, Surgery, and Science in Canada: Challenges, Successes, and Opportunities for Change
Source: PubMed Central journal article supplement — CJC Open. 2020 Jul 2;2(6):522–9. doi: 10.1016/j.cjco.2020.06.016 (PMC7711008; doi:10.1016/j.cjco.2020.06.016), 2020-07-02
Supplement: mmc1.pdf [file mmc1.pdf]

**Supplemental Tables:**

**Supplemental Table S1. Sex Composition of CAPER Medical Sub-specialty Data**

| Year                                | Anes           | ER             | IM            | Peds          | Cards (Adult) | Cards (Peds) | CCM           | Cardiac Surgery | * Other Surgery | Obs Gyn       |
|-------------------------------------|----------------|----------------|---------------|---------------|---------------|--------------|---------------|-----------------|-----------------|---------------|
| % Female (no. of females/total no.) |                |                |               |               |               |              |               |                 |                 |               |
| 2006                                | 39<br>(35/90)  | 50<br>(60/121) | 55<br>(18/33) | 74<br>(26/35) | 14<br>(6/43)  | 67<br>(2/3)  | 35<br>(10/29) | 0<br>(0/10)     | 25<br>(16/65)   | 78<br>(36/46) |
| 2007                                | 37<br>(33/90)  | 43<br>(48/112) | 47<br>(18/38) | 81<br>(35/43) | 40<br>(21/52) | 50<br>(1/2)  | 27<br>(8/30)  | 17<br>(1/6)     | 29<br>(22/75)   | 81<br>(43/53) |
| 2008                                | 46<br>(46/99)  | 56<br>(73/130) | 58<br>(34/59) | 79<br>(37/47) | 23<br>(10/43) | 67<br>(2/3)  | 34<br>(13/38) | 0<br>(0/9)      | 29<br>(20/69)   | 87<br>(40/46) |
| 2009                                | 42<br>(40/95)  | 45<br>(69/152) | 60<br>(28/47) | 78<br>(29/37) | 60<br>(28/47) | 50<br>(2/4)  | 30<br>(12/40) | 11<br>(1/9)     | 33<br>(29/87)   | 76<br>(45/59) |
| 2010                                | 50<br>(51/102) | 44<br>(66/150) | 37<br>(22/59) | 80<br>(44/55) | 28<br>(15/53) | 0<br>(0/4)   | 26<br>(13/50) | 0<br>(0/10)     | 33<br>(25/75)   | 83<br>(49/59) |
| 2011                                | 42<br>(44/104) | 53<br>(81/154) | 51<br>(31/61) | 83<br>(38/46) | 36<br>(16/45) | 67<br>(4/6)  | 31<br>(12/39) | 10<br>(1/10)    | 34<br>(30/88)   | 81<br>(43/53) |
| 2012                                | 49<br>(65/133) | 49<br>(81/167) | 29<br>(15/51) | 89<br>(49/55) | 30<br>(17/56) | 20<br>(2/10) | 30<br>(14/47) | 8<br>(1/13)     | 41<br>(41/100)  | 95<br>(60/63) |
| 2013                                | 42<br>(56/132) | 51<br>(90/178) | 34<br>(14/41) | 82<br>(61/74) | 37<br>(18/49) | 60<br>(3/5)  | 31<br>(18/59) | 0<br>(0/6)      | 32<br>(33/104)  | 88<br>(71/81) |
| 2014                                | 38<br>(47/124) | 47<br>(85/181) | 84<br>(26/31) | 83<br>(60/72) | 31<br>(23/75) | 86<br>(6/7)  | 32<br>(14/44) | 20<br>(2/10)    | 46<br>(42/92)   | 87<br>(71/82) |
| 2015                                | 47<br>(64/137) | 44<br>(76/172) | 29<br>(7/24)  | 80<br>(65/81) | 29<br>(19/66) | 43<br>(3/7)  | 26<br>(19/72) | 33<br>(3/9)     | 39<br>(44/113)  | 85<br>(68/80) |
| 2016                                | 42<br>(52/125) | 46<br>(91/200) | 46<br>(18/39) | 88<br>(73/83) | 36<br>(25/70) | 100<br>(6/6) | 28<br>(14/50) | 40<br>(2/5)     | 38<br>(45/119)  | 90<br>(78/87) |
| 2017                                | 43<br>55/128   | 48<br>28/58    | 52<br>17/33   | 83<br>75/90   | 31<br>18/59   | 50<br>2/4    | 45<br>27/60   | 10<br>1/10      | 42<br>47/113    | 89<br>73/82   |
| 2018                                | 32<br>50/158   | 51<br>39/76    | 50<br>23/46   | 79<br>75/95   | 39<br>25/65   | 50<br>2/4    | 22<br>11/49   | 30<br>3/10      | 42<br>52/123    | 84<br>64/76   |

Abbreviations: Anes = Anesthesia; ER = Emergency Medicine; IM = Internal Medicine; Peds = Pediatrics; Cards = Cardiology; CCM = Critical Care Medicine; Obs Gyn = Obstetrics Gynecology; \* Other Surgery = General Surgery, Vascular Surgery, and Neurosurgery

**Supplemental Table S2. Sex Composition of Trainees in Cardiology Fellowships in 2019**

| <b>Cardiology Sub-Specialty</b>            | <b>Adult</b>   | <b>Pediatric</b> |
|--------------------------------------------|----------------|------------------|
| <i>% Female (no. of females/total no.)</i> |                |                  |
| <b>Electrophysiology</b>                   | 18<br>(7/38)   | 20<br>(1/5)      |
| <b>Interventional Cardiology</b>           | 11<br>(7/64)   | 100<br>(1/1)     |
| <b>Critical Care Cardiology</b>            | 30<br>(3/10)   | N/A<br>(0/0)     |
| <b>Echo, Nuclear, and/or Other Imaging</b> | 30<br>(16/53)  | 60<br>(6/10)     |
| <b>Heart Failure and Transplant</b>        | 53<br>(8/15)   | 75<br>(3/4)      |
| <b>Total Invasive*</b>                     | 15<br>(17/112) | 33<br>(2/6)      |
| <b>Total Non-Invasive*</b>                 | 35<br>(24/68)  | 64<br>(9/14)     |

*\*Invasive = Electrophysiology, Interventional Cardiology, Critical Care; Non-invasive = Imaging, Heart Failure and Transplant.*

**Supplemental Table S3. Sex Composition of Canadian Cardiovascular and Affiliate Society Leadership**

| <b>Organization<br/>(Inaugural Year)</b>                                         | <b>Female<br/>Presidents,<br/>n of total N<br/>(%)</b> | <b>President (Years of Service)</b>                                                                                                                                   |
|----------------------------------------------------------------------------------|--------------------------------------------------------|-----------------------------------------------------------------------------------------------------------------------------------------------------------------------|
| Canadian Cardiovascular Society (CCS, since 1947)                                | 3 of 38 (8%)                                           | Dr. Catherine Kells (2016-2018)<br>Dr. Heather Ross (2014-2016)<br>Dr. Ruth L Collins-Nakai (1999-2002)                                                               |
| Canadian Association of Interventional Cardiology (CAIC, since 1991)             | 0 of 13 (0%)                                           | N/A                                                                                                                                                                   |
| Canadian Society of Cardiovascular Magnetic Resonance (CanSCMR, since pre-2010)* | 0 of 6 (0%)                                            | N/A                                                                                                                                                                   |
| Canadian Cardiac Transplant Network (CCTN, since 2006)                           | 2 of 6 (33%)                                           | Dr. Deb Isaac (2014-2016)<br>Dr. Heather Ross (2010-2012)                                                                                                             |
| Canadian Heart Failure Society (CHFS, since 2011)                                | 1 of 3 (33%)                                           | Dr. Shelley Zeiroth (2018-2020)                                                                                                                                       |
| Canadian Heart Rhythm Society (CHRS, since 2004)                                 | 0 of 8 (0%)                                            | N/A                                                                                                                                                                   |
| Canadian Society of Cardiovascular Nuclear and CT Imaging (CNCT, since 2008)     | 1 of 6 (17%)                                           | Dr. Marla Kiess (2010-2012)                                                                                                                                           |
| Canadian Pediatric Cardiology Association (CPCA, since 2000)                     | 5 of 8 (63%)                                           | Dr. Anne Fournier (2018-2020)<br>Dr. Christina Templeton (2013-2016)<br>Dr. Jennifer Russel (2010-2013)<br>Dr. Reeni Soni (2007-2010)<br>Dr. Marie Béland (2004-2007) |
| Canadian Society of Cardiac Surgeons (CSCS, since 2006)                          | 0 of 7 (0%)                                            | N/A                                                                                                                                                                   |
| Canadian Society for Echocardiography (CSE, since 1998)                          | 1 of 10 (10%)                                          | Dr. Bibiana Cujec (2006-2009)                                                                                                                                         |
| Canadian Cardiovascular Critical Care Society (CANCARE, since 2014)              | 0 of 2 (0%)                                            | N/A                                                                                                                                                                   |
| Canadian Adult Congenital Heart Network (CACHnetwork, since 2008)                | 1 of 2 (50%)                                           | Dr. Arianne Marelli (2016-2020)                                                                                                                                       |

**Supplemental Table S4. Sex Composition of Canadian Cardiovascular Congress Programs**

| <b>Program Year</b>                        | <b>2014</b>  | <b>2015</b>  | <b>2016</b>  | <b>2017</b>  | <b>2018</b>   | <b>Total</b>   |
|--------------------------------------------|--------------|--------------|--------------|--------------|---------------|----------------|
| <i>% Female (no. of females/total no.)</i> |              |              |              |              |               |                |
| <b>AMC Chair</b>                           | 0<br>(0/1)   | 0<br>(0/1)   | 0<br>(0/1)   | 0<br>(0/1)   | 0<br>(0/1)    | 0<br>(0/5)     |
| <b>SPC Chair</b>                           | 0<br>(0/1)   | 0<br>(0/1)   | 100<br>(1/1) | 100<br>(1/1) | 100<br>(1/1)  | 60<br>(3/5)    |
| <b>SPC SC Chair</b>                        | 0<br>(0/7)   | 10<br>(1/10) | 10<br>(1/10) | 20<br>(2/10) | 45<br>(5/11)  | 19<br>(9/48)   |
| <b>SPC Track Captain</b>                   | 0<br>(0/14)  | 21<br>(3/14) | 40<br>(6/15) | 33<br>(4/12) | 50<br>(7/14)  | 29<br>(20/69)  |
| <b>SPC Total</b>                           | 14<br>(4/29) | 15<br>(4/26) | 24<br>(7/29) | 22<br>(6/27) | 42<br>(11/26) | 23<br>(32/137) |
| <b>Major Symposia Chair*</b>               | 17<br>(1/6)  | 25<br>(3/12) | 33<br>(4/12) | 33<br>(4/12) | 40<br>(4/10)  | 31<br>(16/52)  |
| <b>Major Symposia Speaker*</b>             | 19<br>(3/16) | 25<br>(5/20) | 28<br>(5/18) | 33<br>(6/18) | 44<br>(8/18)  | 30<br>(27/90)  |
| <b>Trainee Have a Heart Bursary*</b>       | 42<br>(8/19) | 33<br>(6/15) | 47<br>(7/15) | 33<br>(7/15) | 42<br>(5/12)  | 40<br>(30/76)  |

*Abbreviations: AMC = Annual Meeting Chair; SPC SC = Scientific Program Committee Subcommittee; \* Major Symposia = SPC Symposium, Year-In-Review Symposium, Joint CCS/ACC Symposium, and Joint CCS/ESC Symposium*

**Supplemental Table S5. Sex Composition of Canadian Cardiovascular Society Guidelines Panels**

| <b>Guideline Years</b>                     | <b>Pre-2000</b> | <b>2000-2004</b> | <b>2005-2009</b> | <b>2010-2014</b> | <b>Post-2015</b> | <b>Total</b>     |
|--------------------------------------------|-----------------|------------------|------------------|------------------|------------------|------------------|
| <i>% Female (no. of females/total no.)</i> |                 |                  |                  |                  |                  |                  |
| <b>Chair</b>                               | 13<br>(1/8)     | 28<br>(5/18)     | 19<br>(6/32)     | 17<br>(13/78)    | 8<br>(3/36)      | 16<br>(28/172)   |
| <b>Primary Panelist</b>                    | 16<br>(10/61)   | 28<br>(53/191)   | 24<br>(62/263)   | 23<br>(155/677)  | 23<br>(64/284)   | 23<br>(344/1476) |
| <b>Secondary Panelist</b>                  | 16<br>(10/63)   | 19<br>(28/146)   | 12<br>(20/169)   | 15<br>(51/338)   | 18<br>(32/174)   | 16<br>(141/890)  |

*Abbreviations: CIHR = Canadian Institutes of Health Research; CV = Cardiovascular*

**Supplemental Table S6. Sex Composition of CIHR Cardiovascular Project Grant Committees**

| <b>Committee Year</b>                      | <b>2013</b>   | <b>2014</b>   | <b>2015</b>  | <b>2017</b>   | <b>2018</b>   | <b>Total</b>   |
|--------------------------------------------|---------------|---------------|--------------|---------------|---------------|----------------|
| <i>% Female (no. of females/total no.)</i> |               |               |              |               |               |                |
| <b>Chair</b>                               | 25<br>(1/4)   | 25<br>(1/4)   | 50<br>(2/4)  | 25<br>(1/4)   | 25<br>(1/4)   | 30<br>(6/20)   |
| <b>Scientific Officer</b>                  | 50<br>(4/8)   | 25<br>(2/8)   | 0<br>(0/4)   | 50<br>(2/4)   | 50<br>(2/4)   | 36<br>(10/28)  |
| <b>Total Members</b>                       | 18<br>(11/61) | 16<br>(13/80) | 14<br>(8/56) | 25<br>(14/57) | 18<br>(11/60) | 18<br>(57/314) |

*Abbreviations: CIHR = Canadian Institutes of Health Research; CV = Cardiovascular*

### Supplemental Figures:

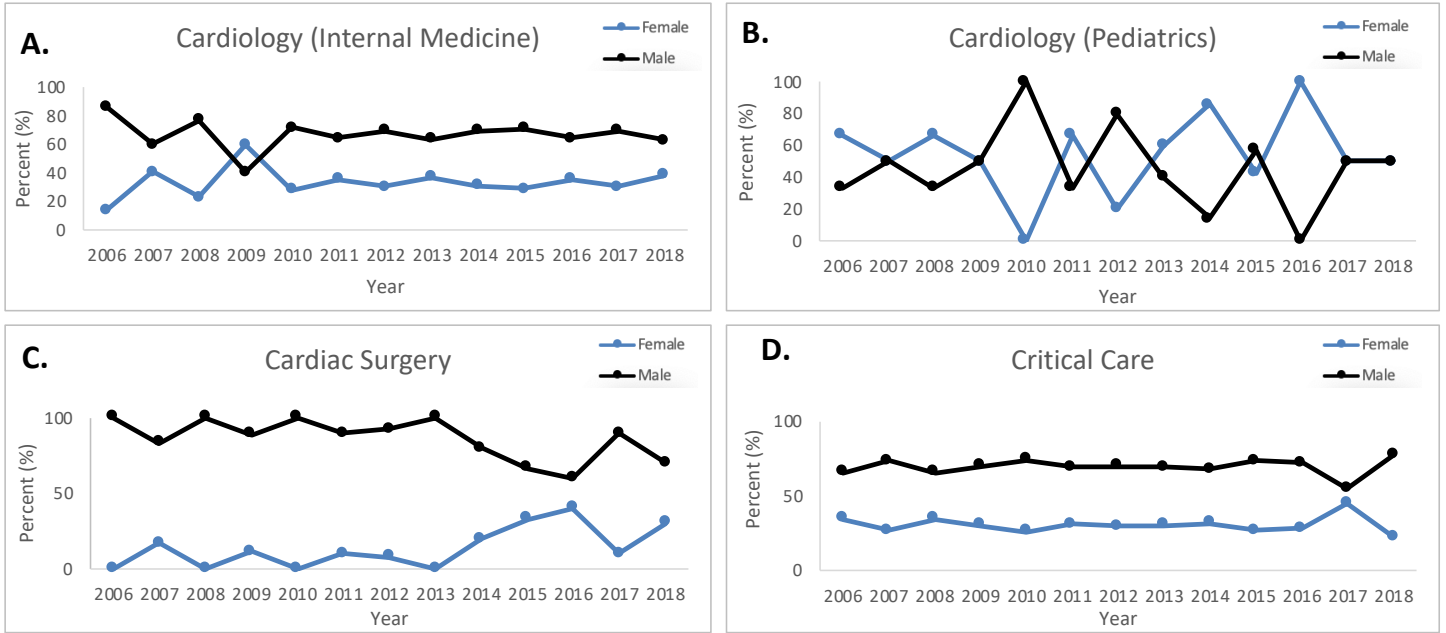

### Supplemental Figure S1. Sex-Based Analysis of CAPER Cohort in Cardiovascular-Related

**Specialties.** The sex composition of the 12-year CAPER cohort in cardiovascular-related specialties of adult cardiology (A), paediatric cardiology (B), cardiac surgery (C), and critical care medicine (D) is shown.

## Supplemental Appendix S1: Understanding Gender Equity in Cardiovascular Medicine and Scientific Careers Questionnaire

### Part A: Demographics

**1. Are you a:**

- Male
- Female
- Prefer not to disclose

**2. Identify your race (check all that apply):**

- Aboriginal (includes Inuit, Métis peoples of Canada, First Nations - North American Indian)
- Arab (includes Egyptian, Kuwait, Libyan)
- West Asian (includes Afghan, Assyrian and Iranian)
- Black (includes African, Nigerian, Somali)
- Chinese
- Filipino
- Japanese
- Korean
- Latin American (includes Chilean, Costa Rican, Mexican)
- South Asian (includes Bangladeshi, Punjabi, Sri Lankan)
- South East Asian (includes Vietnamese, Cambodian, Malaysian, Laotian)
- White (Caucasian)
- Other, if possible, specify (optional to specify) \_\_\_\_\_

**3. Which of the following describe your current career stage (check all that apply):**

- Clinical Trainee:** \_\_ Medical Student \_\_ Surgical Resident \_\_ Core Medical Resident \_\_ Cardiology Resident \_\_ Clinical Fellow
- Research Trainee:** \_\_ Masters \_\_ PhD \_\_ Post-doctoral Fellow
- Clinical Staff:** \_\_ Clinical Associate \_\_ Clinician \_\_ Clinician Quality Improvement \_\_ Clinician Educator \_\_ Clinician Investigator \_\_ Clinician Scientist
- Research Staff:** \_\_ Research Associate \_\_ PhD Scientist
- Appointment:** \_\_ Academic \_\_ Non Academic \_\_ Part-Time \_\_ Full-Time
- Other (specify):** \_\_\_\_\_

**4. What leadership activities are you engaged in within your community (check all that apply):**

- Journal:** \_\_ Editor in Chief \_\_ Associate Editor \_\_ Board Member \_\_ Reviewer
- Any Society / Meeting:** \_\_ Chair \_\_ Vice Chair \_\_ Board Member \_\_ Program Chair
- Any Workshop Committee:** \_\_ Chair \_\_ Member \_\_ Speaker / Panelist \_\_ Reviewer
- Any Guidelines Committee:** \_\_ Chair \_\_ 1° Panel \_\_ 2° Panel \_\_ Reviewer
- Grant Committee:** \_\_ Chair \_\_ Reviewer \_\_ CIHR \_\_ HSFC \_\_ Other (specify): \_\_\_\_\_
- Review Board:** \_\_ Clinical Study \_\_ Ethics \_\_ Faculty \_\_ Quality and Safety \_\_ Other (specify): \_\_\_\_\_
- University:** \_\_ President / Dean \_\_ Vice President / Dean \_\_ Board Member



- Department Head:** \_\_ Cardiac Surgery \_\_ Cardiology \_\_ Research
- Program Director:** \_\_ Cardiac Surgery \_\_ Cardiology \_\_ Research \_\_ Cath Lab \_\_ ECHO Lab \_\_ EP Lab \_\_ Imaging Lab
- Fellowship Director:** \_\_ Cardiac Surgery \_\_ Research \_\_ Cath \_\_ ECHO \_\_ EP \_\_ ACHD \_\_ Heart Failure / Transplant \_\_ Imaging \_\_ Rehab / Prevention \_\_ Women's Health / Pregnancy
- Committee Member:** \_\_ Clinical Study \_\_ Graduate Research \_\_ Ethics Board \_\_ Faculty Evaluation \_\_ Quality and Safety \_\_ Other (specify): \_\_\_\_\_
- Other (specify): \_\_\_\_\_
- None of the above

**5. Do you have responsibilities related to children or caregiving (e.g. elderly relative)?**

- Yes
- No

**6. For the children or other people living with you, to what level are you directly responsible for caring for them? (circle one number)**

**no responsibility**

**total responsibility**

0

1

2

3

4

5

6

N/A

**Part B: Gender Equity and Career**

**7. Have you encountered inequities during your training and/or career that may be related to your sex and/or gender identity?**

- Yes
- No

**8. What challenges have you encountered during your training and/or practice that may relate to your sex and/or gender identity?**

---



---



---



---



---



---



---

**9. What strategies have you used to overcome these personal challenges?**

---



---



---

---

---

---

---

**10. What initiatives have you witnessed and/or participated in to promote gender equity at your institution and/or within the academic community?**

---

---

---

---

---

---

---

**11. What new initiatives would you like to have to promote gender equity at your institution and/or within the academic community?**

---

---

---

---

---

---

---

**12. Other Comments:**

---

---

---

---

---

---

---
